# Supplementary material
Source: publisher figshare collection journal article supplement (https://acs.figshare.com/ndownloader/files/20549232)
Supplement: Supplementary file 1 [file 20549232]

## Sheet: Foglio1
SMILES	name	canvasUID	#stars	#amine	#amidine	#acid	#amide	#rotor	#rtvFG	CNS	mol MW	dipole	SASA	FOSA	FISA	PISA	WPSA	volume	donorHB	accptHB	dip^2/V	ACxDN^.5/SA	glob	QPpolrz	QPlogPC16	QPlogPoct	QPlogPw	QPlogPo/w	QPlogS	CIQPlogS	QPlogHERG	QPPCaco	QPlogBB	QPPMDCK	QPlogKp	IP(eV)	EA(eV)	#metab	QPlogKhsa	HumanOralAbsorption	PercentHumanOralAbsorption	SAfluorine	SAamideO	PSA	#NandO	RuleOfFive	RuleOfThree	#ringatoms	#in34
CC(C)C[C@@H](C(=O)O)NC(=O)[C@H](C(C)C)NC(=O)[C@H](CC(C)C)NC(=O)[C@@H](N)C(C)C	VLVL	859	0	1	0	1	3	14	0	-2	442.598	0	749.822	551.856	197.967	0	0	1476.75	3.75	8.25	0	0.0213065	0.836394	43.956	14.073	25.154	17.424	-0.4	-2.097	-1.788	1.025	3.064	-1.768	3.921	-5.886	0	0	6	-0.791	2	20.348	0	54.369	166.689	9	1	1	0	0
CC[C@H](C)[C@@H](C(=O)O)NC(=O)[C@H](Cc1c[nH]cn1)NC(=O)[C@@H](N)CCSC	MHI	860	0	1	0	1	2	13	0	-2	399.507	0	667.644	306.534	225.771	100.994	34.346	1243.5	4.5	9	0	0.0285959	0.837628	36.228	13.331	24.016	18.443	-1.506	-1.66	-1.598	-0.811	2.562	-1.882	3.138	-6.139	0	0	6	-1.127	1	12.481	0	31.012	163.319	9	1	1	5	0
CC(C)C[C@@H](C(=O)O)NC(=O)[C@H](C(C)C)NC(=O)[C@H](CCCC[NH3+])NC(=O)[C@@H](N)CC(=O)N	NKVL	861	9	2	0	1	4	18	0	-2	472.584	0	787.914	444.487	343.427	0	0	1511.68	6.75	10.75	0	0.0354472	0.808464	42.786	16.187	31.124	26.817	-3.821	1.198	0.478	1.222	0.018	-3.227	0.031	-10.246	0	0	10	-1.791	1	0	0	85.963	247.043	12	2	2	0	0
CC[C@H](C)[C@H](N)C(=O)N[C@@H](C)C(=O)N[C@@H](CCC([O-])=O)C(=O)N[C@H](C(=O)O)CCCC[NH3+]	IAEK	862	7	2	0	2	3	18	0	-2	459.542	0	803.008	473.19	329.818	0	0	1478.06	6.75	11.25	0	0.0363986	0.781461	41.44	15.933	30.158	24.734	-3.007	-0.048	0.235	1.218	0.011	-3.325	0.012	-9.995	0	0	9	-1.821	1	0	0	51.916	244.345	12	2	2	0	0
[O-]C(=O)CC[C@@H](C(=O)O)NC(=O)[C@H](CC(=O)N)NC(=O)[C@H](CC(C)C)NC(=O)[C@H](C)N	ALNE	863	7	1	0	2	4	15	0	-2	445.472	0	773.479	380.682	392.797	0	0	1404.89	6.5	12.5	0	0.041202	0.784291	40.438	15.627	31.213	30.213	-4.339	0.485	0.46	3.364	0.005	-4.199	0.011	-9.381	0	0	9	-2.307	1	0	0	100.495	276.161	13	2	2	0	0
N1CCC[C@H]1C(=O)N[C@@H](CCSC)C(=O)N[C@@H](Cc2c[nH]cn2)C(=O)N[C@H](C(=O)O)[C@@H](C)CC	PMHI	864	0	1	0	1	3	14	0	-2	496.624	0	844.661	521.601	210.24	69.908	42.912	1568.32	3.75	11.25	0	0.0257921	0.77287	48.288	16.089	27.75	20.433	-0.904	-3.293	-2.075	-0.336	2.821	-2.123	5.043	-5.866	0	0	5	-1.133	1	3.795	0	44.267	186.02	11	2	1	10	0
CC(C)C[C@@H](C(=O)O)NC(=O)[C@H](CCCNC(N)=[NH2+])NC(=O)[C@H]([C@@H](C)CC)NC(=O)[C@@H](N)Cc1c[nH]cn1	HIRL	865	8	1	1	1	3	19	0	-2	537.661	0	804.007	402.103	341.532	60.372	0	1604.98	8.75	12.25	0	0.0450692	0.824553	46.454	17.786	35.843	28.334	-2.88	-0.926	-1.989	0.546	0.161	-3.532	0.132	-9.902	0	0	8	-1.595	1	0	0	44.004	258.503	14	3	2	5	0
CC[C@H](C)[C@H](N)C(=O)N[C@@H]([C@@H](C)CC)C(=O)N[C@@H](C)C(=O)N[C@@H](CCC([O-])=O)C(=O)N[C@H](C(=O)O)CCCC[NH3+]	IIAEK	866	10	2	0	2	4	22	0	-2	572.701	0	932.423	588.082	344.342	0	0	1811.96	7	13	0	0.0368875	0.770875	52.234	19.167	35.528	27.699	-2.46	-0.279	-0.577	2.421	0.006	-3.829	0.009	-9.879	0	0	10	-1.836	1	0	0	70.132	275.597	14	3	2	0	0
CC[C@H](C)[C@@H](C(=O)O)NC(=O)[C@H](Cc1c[nH]cn1)NC(=O)[C@H](CCSC)NC(=O)[C@@H]2CCCN2C(=O)[C@@H](N)CC(C)C	LPMHI	867	3	1	0	1	4	18	0	-2	609.783	0	961.159	607.942	238.952	79.77	34.495	1891.69	4.75	13.75	0	0.0311784	0.769608	58.755	19.423	34.541	24.849	-0.918	-3.269	-2.601	0.939	1.227	-2.728	2.303	-5.977	0	0	8	-1.306	1	0	0	55.494	219.083	13	3	2	10	0
[NH3+]CCCC[C@@H](C(=O)O)NC(=O)[C@H](Cc1ccccc1)NC(=O)[C@H](C(C)C)NC(=O)[C@H](C)NC(=O)[C@@H]2CCCN2C(=O)[C@@H](N)[C@@H](C)CC	IPAVFK	868	9	2	0	1	5	21	0	-2	673.851	0	1080.57	635.645	277.151	167.775	0	2128.49	6	14	0	0.0317358	0.740559	67.146	22.804	39.316	28.621	-1.29	-2.549	-2.002	0.697	0.098	-3.274	0.149	-8.145	0	0	11	-1.342	1	0	0	72.018	249.131	14	3	2	11	0
c1ccccc1C[C@@H](C(=O)O)NC(=O)[C@H](C(C)C)NC(=O)[C@H](C)NC(=O)[C@@H]2CCCN2C(=O)[C@H]([C@@H](C)CC)NC(=O)[C@@H](N)CCCC[NH3+]	KIPAVF	869	9	2	0	1	5	21	0	-2	673.851	0	1094.47	669.778	281.83	142.863	0	2137.86	6	14	0	0.0313328	0.733298	67.283	22.869	39.249	27.532	-1.309	-3.213	-2.002	0.698	0.113	-3.399	0.134	-8.319	0	0	11	-1.332	1	0	0	58.715	250.929	14	3	2	11	0
CC(C)C[C@@H](C(=O)O)NC(=O)[C@H](CCCNC(N)=[NH2+])NC(=O)[C@H]([C@@H](C)CC)NC(=O)[C@H](Cc1c[nH]cn1)NC(=O)[C@@H](N)CCSC	MHIRL	870	11	1	1	1	4	24	0	-2	668.853	0	1001.94	565.49	343.717	54.66	38.075	1996.73	9	14.5	0	0.0434157	0.765366	58.867	21.926	41.269	31.96	-2.07	-1.833	-2.981	0.99	0.101	-4.303	0.203	-9.483	0	0	9	-1.711	1	0	0	66.715	287.69	16	3	2	5	0
c1ccccc1C[C@@H](C(=O)O)NC(=O)[C@H](C(C)C)NC(=O)[C@H](C)NC(=O)[C@@H]2CCCN2C(=O)[C@@H](N)[C@@H](C)CC	IPAVF	871	0	1	0	1	4	14	0	-2	545.678	0	905.522	566.786	194.565	144.171	0	1746.86	3.75	11.25	0	0.0240585	0.774649	56.143	17.782	30.527	21.671	-0.41	-3.77	-2.439	0.713	3.333	-2.043	4.249	-5.316	0	0	8	-1.012	1	0	0	53.826	191.733	11	3	2	11	0
C[C@H](N)C(=O)N[C@@H](CC(C)C)C(=O)N[C@@H](CC(=O)N)C(=O)N[C@@H](CCC([O-])=O)C(=O)N[C@@H](CC(=O)N)C(=O)N[C@H](C(=O)O)CCCC[NH3+]	ALNENK	872	13	2	0	2	7	26	0	-2	687.749	0	1014.58	498.119	516.455	0	0	2004.15	10.75	19.25	0	0.0622087	0.757707	57.358	23.055	47.235	43.65	-7.319	2	1.796	6.331	0	-6.204	0	-12.667	0	0	15	-3.68	1	0	0	121.701	418.084	20	3	2	0	0
CC(C)C[C@@H](C(=O)O)NC(=O)[C@H](C(C)C)NC(=O)[C@H](CCCC[NH3+])NC(=O)[C@H](CC(=O)N)NC(=O)[C@H](CCC([O-])=O)NC(=O)[C@@H](N)CC(=O)N	NENKVL	873	14	2	0	2	7	27	0	-2	715.802	0	1087.52	542.793	544.725	0	0	2135.88	10	18.5	0	0.0537942	0.73753	61.987	24.532	47.889	44.079	-6.438	2	0.944	6.004	0	-6.943	0	-13.092	0	0	15	-3.366	1	0	0	150.331	411.847	20	3	2	0	0
CC(C)C[C@@H](C(=O)O)NC(=O)[C@H](C(C)C)NC(=O)[C@H](CCCC[NH3+])NC(=O)[C@H](CC(=O)N)NC(=O)[C@H](CCC([O-])=O)NC(=O)[C@H](CC(=O)N)NC(=O)[C@H](CC(C)C)NC(=O)[C@H](C)N	ALNENKVL	874	19	2	0	2	9	33	0	-2	900.04	0	1351.16	757.724	593.435	0	0	2707.23	11.25	22.75	0	0.0564744	0.695251	81	31.008	58.535	53.783	-6.625	2	0.467	8.069	0	-8.813	0	-13.413	0	0	17	-3.857	1	0	0	204.985	478.152	24	3	2	0	0
CC(C)C[C@H](N)C(=O)N[C@@H](CCCN=C(N)N)C(=O)N1CCC[C@H]1C(=O)O	CHEMBL188695	88	4	1	1	1	2	12	0	-2	384.478	0	744.673	417.174	327.499	0	0	1299.07	7.25	9.75	0	0.035254	0.773191	38.129	14.382	28.722	24.908	-2.992	-1.72	-0.608	-1.372	0.201	-3.413	0.184	-10.528	0	0	7	-1.344	1	0	0	48.56	201.748	10	1	2	5	0
C[C@H](N)C(=O)N[C@@H](CC(C)C)C(=O)N1CCC[C@H]1C(=O)O	CHEMBL3321996	89	1	1	0	1	2	7	0	-2	299.369	0	582.355	402.916	179.44	0	0	1027.89	3.25	7.75	0	0.0239914	0.845816	30.488	9.764	18.977	16.321	-2.062	-1.193	-0.022	-0.197	5.728	-1.132	6.072	-6.217	0	0	5	-1.133	2	28.439	0	42.306	131.964	7	0	1	5	0
CC(C)C[C@H](N)C(=O)N[C@@H](CCCCN)C(=O)N1CCC[C@H]1C(=O)O	CHEMBL1807676	90	1	2	0	1	2	12	0	-2	356.464	0	686.342	446.427	239.914	0	0	1231.16	5.25	8.75	0	0.0292111	0.80941	35.412	12.556	24.03	19.857	-2.537	-0.297	0.455	-1.512	0.376	-1.804	0.359	-8.914	0	0	7	-1.166	1	0	0	43.156	157.157	8	1	2	5	0
c1ccccc1C[C@H](N)C(=O)N[C@@H](CCC(=O)O)C(=O)N2CCC[C@H]2C(=O)O	CHEMBL3321995	91	0	1	0	2	2	10	0	-2	391.423	0	710.213	224.55	292.477	193.186	0	1249.2	4.25	9.75	0	0.0283016	0.789826	39.263	14.274	25.71	21.907	-1.741	-1.921	-1.318	-0.216	0.111	-2.766	0.121	-7.332	0	0	7	-1.312	1	0	0	48.005	182.941	9	0	2	11	0
CC[C@H](C)[C@H](N)C(=O)N[C@@H](CCC(=O)O)C(=O)N1CCC[C@H]1C(=O)O	CHEMBL3321997	130	1	1	0	2	2	10	0	-2	357.406	0	662.087	371.099	290.988	0	0	1173.3	4.25	9.75	0	0.0303588	0.812559	34.38	12.136	23.889	20.363	-2.361	-1.261	-0.356	1.073	0.117	-2.579	0.126	-7.985	0	0	6	-1.443	1	0	0	46.601	181.183	9	0	1	5	0
CC(C)C[C@H](N)C(=O)N[C@@H](C)C(=O)N1CCC[C@H]1C(=O)O	CHEMBL1807677	131	1	1	0	1	2	7	0	-2	299.369	0	577.919	402.805	175.114	0	0	1019.41	3.25	7.75	0	0.0241756	0.847611	30.148	9.657	18.794	15.24	-2.079	-1.593	-0.022	-0.168	8.148	-1.085	6.725	-6.137	0	0	5	-1.149	2	31.077	0	28.232	131.019	7	0	1	5	0
[H]/N=C(N)\NCCC[C@H](NC(=O)CN)C(=O)N1CCC[C@H]1C(=O)O	CHEMBL3321998	132	6	1	1	1	2	10	0	-2	328.37	0	625.798	276.252	349.546	0	0	1076.06	7.25	9.75	0	0.0419507	0.811499	30.489	12.287	26.73	25.402	-4.302	-0.378	0.297	-0.752	0.119	-3.179	0.11	-11.127	0	0	6	-1.616	1	0	0	51.123	206.431	10	1	1	5	0
CC(C)C[C@H](N)C(=O)N[C@@H](CO)C(=O)N1CCC[C@H]1C(=O)O	CHEMBL3321999	133	1	1	0	1	2	9	0	-2	315.369	0	585.785	356.841	228.944	0	0	1040.18	3.25	8.45	0	0.0260052	0.847553	29.695	10.235	19.764	16.243	-2.576	-1.068	-0.077	-0.169	2.295	-1.705	1.888	-6.937	0	0	6	-1.282	1	18.32	0	33.225	153.858	8	0	1	5	0
CC[C@H](C)[C@H](N)C(=O)N[C@@H](C)C(=O)N1CCC[C@H]1C(=O)O	CHEMBL1221478	134	1	1	0	1	2	7	0	-2	299.369	0	582.322	405.237	177.085	0	0	1021.13	3.25	7.75	0	0.0239928	0.842151	30.217	9.673	18.792	15.85	-2.09	-1.396	-0.022	-0.256	6.75	-1.125	6.419	-6.174	0	0	5	-1.152	2	29.552	0	36.157	129.907	7	0	1	5	0
CSCC[C@H](N)C(=O)N[C@@H](CC(=O)N)C(=O)N1CCC[C@H]1C(=O)O	CHEMBL3322000	135	2	1	0	1	3	10	0	-2	360.427	0	645.409	329.535	272.657	0	43.217	1136.92	5	10.5	0	0.0363781	0.816239	32.925	12.132	24.489	23.657	-3.771	-0.323	0.505	0.699	0.465	-2.263	1.16	-7.647	0	0	7	-1.787	1	0	0	68.312	183.246	9	1	2	5	0
CC(C)C[C@H](N)C(=O)N[C@@H](CCC(=O)O)C(=O)N1CCC[C@H]1C(=O)O	CHEMBL3322001	136	1	1	0	2	2	10	0	-2	357.406	0	656.615	371.611	285.004	0	0	1168.49	4.25	9.75	0	0.0306118	0.817091	34.188	12.045	23.777	19.372	-2.34	-1.602	-0.356	1.146	0.169	-2.487	0.145	-7.875	0	0	6	-1.446	1	0	0	33.946	182.611	9	0	1	5	0
C[C@@H](O)[C@H](N)C(=O)N[C@@H](CC(=O)N)C(=O)N1CCC[C@H]1C(=O)O	CHEMBL3322002	137	4	1	0	1	3	9	0	-2	330.34	0	580.097	255.108	324.989	0	0	1023.14	5	10.7	0	0.0412447	0.846488	29.013	11.144	24.091	24.679	-4.922	0.747	1.058	1.189	0.133	-2.604	0.196	-8.708	0	0	8	-1.917	1	0	0	74.006	204.734	10	1	2	5	0
CC(C)[C@H](N)C(=O)N[C@@H](CO)C(=O)N1CCC[C@H]1C(=O)O	CHEMBL3322003	138	1	1	0	1	2	8	0	-2	301.342	0	566.393	348.048	218.345	0	0	988.81	3.25	8.45	0	0.0268955	0.847465	28.281	9.666	19.07	17.282	-2.798	-0.533	0.165	-0.17	2.294	-1.547	2.424	-6.838	0	0	6	-1.35	1	17.013	0	45.893	150.677	8	0	1	5	0
CC(C)[C@H](N)C(=O)N[C@@H](CC(C)C)C(=O)N1CCC[C@H]1C(=O)O	CHEMBL3322004	139	0	1	0	1	2	8	0	-2	327.423	0	623.92	459.334	164.586	0	0	1124.94	3.25	7.75	0	0.0223931	0.83841	33.729	10.567	19.888	15.41	-1.397	-1.967	-0.52	-0.317	9.398	-1.081	8.622	-5.847	0	0	5	-0.963	2	36.181	0	32.989	128.076	7	0	1	5	0
CC[C@H](C)[C@H](N)C(=O)N[C@@H](CC(C)C)C(=O)N1CCC[C@H]1C(=O)O	CHEMBL3322005	140	0	1	0	1	2	9	0	-2	341.45	0	651.513	488.085	163.428	0	0	1180.21	3.25	7.75	0	0.0214447	0.828986	35.299	11.07	20.341	15.206	-1.07	-2.251	-0.775	-0.469	9.74	-1.166	8.861	-5.73	0	0	5	-0.886	2	38.371	0	32.417	127.667	7	0	1	5	0
CC(C)C[C@H](N)C(=O)N[C@@H](CC(=O)N)C(=O)N1CCC[C@H]1C(=O)O	CHEMBL3322006	141	2	1	0	1	3	9	0	-2	342.394	0	638.773	364.877	273.896	0	0	1125.74	5	10	0	0.0350057	0.819304	33.119	11.729	24.205	23.85	-3.835	-0.078	0.652	0.749	0.401	-2.301	0.653	-7.766	0	0	7	-1.703	1	0	0	74.904	183.81	9	1	2	5	0
CC(C)[C@H](N)C(=O)NCC(=O)N1CCC[C@H]1C(=O)O	CHEMBL3322007	142	1	1	0	1	2	6	0	-2	271.316	0	536.198	339.853	196.345	0	0	917.792	3.25	7.75	0	0.0260566	0.851797	26.723	8.831	17.891	16.169	-2.806	-0.856	0.455	-0.1	4.347	-1.204	4.074	-6.625	0	0	5	-1.32	2	21.94	0	37.217	133.488	7	0	1	5	0
NCCCC[C@H](NC(=O)CN)C(=O)N1CCC[C@H]1C(=O)O	CHEMBL3322008	143	2	2	0	1	2	10	0	-2	300.357	0	594.377	324.396	269.981	0	0	1021.18	5.25	8.75	0	0.0337307	0.825095	28.292	10.746	22.013	20.707	-3.914	0.859	1.388	-1.258	0.175	-1.886	0.177	-9.66	0	0	7	-1.494	1	0	0	48.911	162.553	8	1	2	5	0
c1cc(O)ccc1C[C@H](NC(=O)[C@@H](N)C(C)C)C(=O)N2CCC[C@H]2C(=O)O	CHEMBL389820	144	0	1	0	1	2	9	0	-2	377.439	0	650.65	296.931	223.877	129.842	0	1207.51	4.25	8.5	0	0.0269318	0.842837	37.631	12.895	24.046	19.383	-1.58	-1.684	-1.48	-0.864	2.198	-1.682	2.127	-6.387	0	0	7	-0.954	1	23.813	0	41.627	149.6	8	0	2	11	0
CC[C@H](C)[C@H](N)C(=O)N[C@@H](CCCCN)C(=O)N1CCC[C@H]1C(=O)O	CHEMBL3322009	145	1	2	0	1	2	12	0	-2	356.464	0	694.025	455.655	238.37	0	0	1234.8	5.25	8.75	0	0.0288877	0.802024	35.558	12.592	23.959	20.123	-2.517	-0.295	0.455	-1.631	0.364	-1.833	0.373	-8.886	0	0	7	-1.169	1	0	0	46.645	155.848	8	1	2	5	0
c1ccccc1C[C@H](N)C(=O)N[C@@H](C)C(=O)N2CCC[C@H]2C(=O)O	CHEMBL28361	146	0	1	0	1	2	7	0	-1	333.386	0	555.675	248.675	168.369	138.631	0	1041.19	3.25	7.75	0	0.0251433	0.894052	32.343	10.954	20.189	15.719	-1.685	-1.432	-0.987	-0.077	10.334	-0.864	7.885	-5.525	0	0	6	-1.044	2	35.231	0	23.303	130.194	7	0	1	11	0
C[C@H](N)C(=O)N[C@@H](C(C)C)C(=O)N1CCC[C@H]1C(=O)O	CHEMBL1807688	147	1	1	0	1	2	6	0	-1	285.342	0	529.09	363.099	165.992	0	0	956.025	3.25	7.75	0	0.0264067	0.88705	28.254	9.144	18.343	15.942	-2.331	-0.758	0.219	0.47	8.443	-0.806	8.34	-6.065	0	0	5	-1.194	2	29.881	0	37.164	129.101	7	0	1	5	0
[H]/N=C(N)\NCCC[C@H](NC(=O)[C@@H](N)C(C)C)C(=O)N1CCC[C@H]1C(=O)O	CHEMBL3322010	148	2	1	1	1	2	11	0	-2	370.451	0	617.321	378.811	238.51	0	0	1155.89	7.25	9.75	0	0.0425268	0.862845	33.042	12.319	26.514	22.711	-2.987	-0.87	-0.373	0.079	2.042	-1.837	1.506	-8.984	0	0	6	-1.401	1	2.045	0	28.213	189.023	10	1	1	5	0
c1cc(O)ccc1C[C@H](NC(=O)[C@@H](N)CC(C)C)C(=O)N2CCC[C@H]2C(=O)O	CHEMBL3322011	149	0	1	0	1	2	10	0	-2	391.466	0	683.659	346.764	205.63	131.265	0	1258.76	4.25	8.5	0	0.0256315	0.824682	39.054	13.251	24.053	18.148	-1.176	-2.455	-1.737	-1.165	4.173	-1.656	3.273	-5.949	0	0	7	-0.904	2	31.165	0	28.392	152.061	8	0	2	11	0
O=C(O)C[C@H](N)C(=O)N[C@@H](CC(C)C)C(=O)N1CCC[C@H]1C(=O)O	CHEMBL3322012	150	1	1	0	2	2	9	0	-2	343.379	0	627.077	349.803	277.274	0	0	1112.82	3.25	8.75	0	0.0251553	0.828187	32.602	11.236	21.598	17.643	-2.105	-1.306	-0.475	1.326	0.171	-2.276	0.174	-7.828	0	0	6	-1.349	1	0.9	0	42.364	181.241	9	0	1	5	0
[H]\N=C(N)\NCCC[C@H](NC(=O)[C@@H](N)[C@@H](C)CC)C(=O)N1CCC[C@H]1C(=O)O	CHEMBL3322013	151	2	1	1	1	2	12	0	-2	384.478	0	708.054	400.73	307.325	0	0	1275.78	7.25	9.75	0	0.0370772	0.803431	37.197	13.917	28.484	23.949	-2.923	-1.537	-0.608	-0.883	0.375	-2.935	0.297	-10.157	0	0	6	-1.332	1	0	0	38.652	198.761	10	1	1	5	0
c1ccccc1C[C@H](N)C(=O)N[C@@H](CCC(=O)N)C(=O)N2CCC[C@H]2C(=O)O	CHEMBL3322014	152	2	1	0	1	3	10	0	-2	390.438	0	653.497	230.261	278.405	144.832	0	1205.88	5.25	10.25	0	0.0359385	0.838411	37.067	13.596	26.6	24.729	-3.329	-0.308	-0.434	0.367	0.418	-2.281	0.587	-7.243	0	0	8	-1.585	1	0	0	67.285	179.831	9	1	2	11	0
CC(C)C[C@H](N)C(=O)N[C@@H](CCC(=O)N)C(=O)N1CCC[C@H]1C(=O)O	CHEMBL3322015	153	2	1	0	1	3	10	0	-2	356.421	0	679.552	382.405	297.147	0	0	1190.59	5.25	10.25	0	0.0345606	0.799436	35.072	12.586	25.45	25.294	-3.789	-0.056	0.507	0.427	0.198	-2.74	0.377	-8.098	0	0	7	-1.69	1	0	0	85.651	185.634	9	1	2	5	0
NCC(=O)N[C@@H](CCC(=O)O)C(=O)N1CCC[C@H]1C(=O)O	CHEMBL3322016	154	2	1	0	2	2	8	0	-2	301.299	0	534.88	253.446	281.434	0	0	938.528	4.25	9.75	0	0.0375788	0.86671	26.269	9.924	21.262	20.083	-3.506	-0.055	0.579	1.949	0.158	-2.018	0.158	-8.001	0	0	6	-1.726	1	0	0	41.869	182.762	9	0	1	5	0
CC(C)[C@H](N)C(=O)N[C@@H](CCSC)C(=O)N1CCC[C@H]1C(=O)O	CHEMBL3322017	155	0	1	0	1	2	9	0	-2	345.456	0	630.99	403.017	180.929	0	47.043	1135.41	3.25	8.25	0	0.0235707	0.834149	33.506	11.108	20.455	16.692	-1.454	-1.612	-0.68	-0.385	5.309	-1.199	10.612	-6.053	0	0	5	-1.058	2	31.41	0	44.679	129.035	7	0	1	5	0
O=C(O)[C@@H]1CCCN1C(=O)[C@H](C)NC(=O)[C@@H](NC(=O)CN)Cc2c[nH]c(c23)cccc3	CHEMBL3322018	156	1	1	0	1	3	9	0	-2	429.475	0	665.985	280.51	236.138	149.337	0	1271.8	4.5	9.5	0	0.0302597	0.852405	40.391	13.757	26.239	21.648	-2.263	-1.388	-1.621	0.572	1.428	-1.747	1.593	-6.544	0	0	7	-1.259	1	3.504	0	50.558	181.029	10	1	2	14	0
O=C(O)[C@@H]1CCCN1C(=O)[C@H](C)NC(=O)[C@H](C(C)C)NC(=O)[C@@H](N)Cc2ccccc2	CHEMBL1807679	157	0	1	0	1	3	10	0	-2	432.519	0	696.813	384.683	183.547	128.584	0	1347.33	3.5	9.5	0	0.0255059	0.846639	42.573	13.68	25.005	18.635	-1.341	-2.139	-1.568	0.578	5.63	-1.348	5.511	-5.552	0	0	7	-1.103	2	32.523	0	38.354	158.481	9	0	2	11	0
C[C@H](N)C(=O)N[C@@H](C(C)C)C(=O)NCC(=O)N1CCC[C@H]1C(=O)O	CHEMBL3322019	158	2	1	0	1	3	8	0	-2	342.394	0	646.462	422.782	223.68	0	0	1137.97	3.5	9.5	0	0.0274925	0.815409	34.251	11.151	21.868	20.105	-3.048	-0.926	0.44	0.686	1.519	-1.763	2.137	-6.936	0	0	6	-1.54	1	12.35	0	62.024	168.311	9	0	1	5	0
O=C(O)[C@@H]1CCCN1C(=O)[C@H](Cc2ccc(O)cc2)NC(=O)[C@@H]3CCCN3C(=O)[C@@H](N)CO	CHEMBL3322020	159	3	1	0	1	3	11	0	-2	462.502	0	699.261	345.323	248.794	105.144	0	1352.35	4.25	12.2	0	0.0359679	0.845767	41.908	14.19	27.859	22.923	-2.864	-1.148	-1.165	0.675	1.209	-2.02	1.182	-6.741	0	0	9	-1.538	1	0	0	44.574	197.583	11	2	2	16	0
CC(C)[C@H](N)C(=O)N[C@@H](CO)C(=O)N[C@@H](CO)C(=O)N1CCC[C@H]1C(=O)O	CHEMBL3322021	160	3	1	0	1	3	12	0	-2	388.42	0	696.409	400.408	296.001	0	0	1234	3.5	10.9	0	0.0292817	0.798933	35.525	12.599	23.858	20.999	-3.524	-0.763	0.097	0.419	0.33	-2.853	0.388	-7.885	0	0	8	-1.728	1	0	0	59.128	206.678	11	2	2	5	0
CC(C)[C@H](N)C(=O)N[C@@H](C(C)C)C(=O)N1CCC[C@H]1C(=O)N2CCC[C@H]2C(=O)O	CHEMBL3322022	161	0	1	0	1	3	8	0	-1	410.512	0	664.211	529.145	135.066	0	0	1287.45	3.25	10.75	0	0.0291772	0.861681	40.233	11.849	23.683	18.603	-1.918	-1.685	-0.404	1.434	16.454	-0.733	17.305	-5.303	0	0	6	-1.321	2	37.483	0	37.6	148.049	9	0	1	10	0
CC(C)C[C@H](N)C(=O)N[C@@H](C(C)C)C(=O)N1CCC[C@H]1C(=O)N2CCC[C@H]2C(=O)O	CHEMBL3322109	162	0	1	0	1	3	9	0	-2	424.539	0	772.078	587.303	184.774	0	0	1414.5	3.25	10.75	0	0.0251009	0.789296	44.675	13.487	25.217	19.854	-1.614	-2.768	-0.664	0.263	4.475	-1.558	5.354	-6.123	0	0	6	-1.171	2	29.143	0	49.418	150.651	9	0	1	10	0
CC[C@H](C)[C@H](N)C(=O)N[C@@H](CC(C)C)C(=O)N1CCC[C@H]1C(=O)N2CCC[C@H]2C(=O)O	CHEMBL3322110	163	0	1	0	1	3	10	0	-2	438.566	0	781.116	600.493	180.624	0	0	1447.78	3.25	10.75	0	0.0248104	0.792352	45.365	13.748	25.446	19.156	-1.381	-2.958	-0.926	0.313	5.507	-1.559	5.905	-5.951	0	0	6	-1.13	2	32.119	0	43.049	151.735	9	0	1	10	0
N1CCC[C@H]1C(=O)N[C@@H](CCCCN)C(=O)N[C@@H](Cc2cnc[nH]2)C(=O)N3CCC[C@H]3C(=O)O	CHEMBL3322111	164	2	2	0	1	3	13	0	-2	477.562	0	810.137	467.544	270.404	72.19	0	1505.68	5.5	12.5	0	0.0361853	0.784202	46.445	15.975	30.58	25.71	-3.09	-0.659	-0.152	-0.89	0.15	-2.354	0.175	-9.126	0	0	7	-1.48	1	0	0	56.898	204.103	12	2	2	15	0
NCCCC[C@H](NC(=O)[C@@H](N)CO)C(=O)N[C@@H](C(C)C)C(=O)N1CCC[C@H]1C(=O)N2CCC[C@H]2C(=O)O	CHEMBL3322112	165	6	2	0	1	4	16	0	-2	526.632	0	895.557	585.775	309.781	0	0	1691.49	5.5	14.2	0	0.0371858	0.76663	51.266	17.561	33.477	26.6	-3.644	-1.045	0.49	0.545	0.065	-3.118	0.069	-9.818	0	0	10	-1.801	1	0	0	55.486	233.525	13	3	2	10	0
C[C@H](N)C(=O)N1CCC[C@H]1C(=O)N[C@@H](C(C)C)C(=O)N2CCC[C@H]2C(=O)N3CCC[C@H]3C(=O)O	CHEMBL3322113	166	2	1	0	1	4	8	0	-2	479.575	0	800.867	590.833	210.034	0	0	1511.01	3.25	13.75	0	0.0309516	0.795149	49.18	14.514	28.937	24.689	-2.986	-1.856	0.011	1.732	1.814	-1.735	2.95	-6.685	0	0	7	-1.719	1	1.131	0	68.584	175.929	11	1	2	15	0
N1CCC[C@H]1C(=O)N[C@@H](C(C)C)C(=O)N2CCC[C@H]2C(=O)N[C@@H](CCC(=O)N)C(=O)N3CCC[C@H]3C(=O)O	CHEMBL3322114	167	3	1	0	1	5	11	0	-2	536.627	0	891.829	607.968	283.861	0	0	1675.98	4.5	15.5	0	0.0368686	0.765122	53.856	17.026	33.644	30.708	-4.011	-1.188	0.275	2.621	0.199	-2.934	0.516	-7.758	0	0	7	-2.132	1	0	0	101.083	229.163	13	3	2	15	0
O=C(O)[C@@H]1CCCN1C(=O)[C@H](CCSC)NC(=O)[C@H](C(C)C)NC(=O)[C@@H](NC(=O)CN)CCCN/C(=N/[H])N	CHEMBL3322115	168	9	1	1	1	4	18	0	-2	558.695	0	860.275	473.9	354.114	0	32.261	1675.93	7.75	13.75	0	0.0444955	0.793167	49.359	18.248	36.386	31.044	-3.533	-0.667	-1.073	1.7	0.063	-3.796	0.148	-10.443	0	0	8	-1.909	1	0	0	79.874	262.104	14	3	2	5	0
O=C(O)[C@@H]1CCCN1C(=O)[C@H]([C@@H](C)CC)NC(=O)[C@@H]2CCCN2C(=O)[C@H](CCC(=O)N)NC(=O)[C@@H]3CCCN3	CHEMBL3322116	169	4	1	0	1	5	12	0	-2	550.654	0	916.662	626.696	289.966	0	0	1719.39	4.5	15.5	0	0.0358698	0.757191	54.951	17.541	34.003	30.966	-3.815	-1.228	0.015	2.492	0.159	-3.133	0.447	-7.774	0	0	7	-2.092	1	0	0	106.173	227.766	13	3	2	15	0
C[C@@H](O)[C@H](N)C(=O)N[C@@H](CCCCN)C(=O)N[C@@H](C(C)C)C(=O)N[C@@H]([C@@H](C)CC)C(=O)N1CCC[C@H]1C(=O)O	CHEMBL3322117	170	7	2	0	1	4	19	0	-2	556.701	0	911.75	607.511	304.239	0	0	1768.96	5.75	12.95	0	0.0340587	0.775833	52.44	18.175	33.67	26.295	-2.705	-0.56	-0.454	0.694	0.054	-3.154	0.079	-9.428	0	0	10	-1.551	1	0	0	71.981	237.162	13	3	2	5	0
[nH]1cncc1C[C@H](NC(=O)[C@@H](N)C(C)C)C(=O)N[C@@H](CC(C)C)C(=O)N2CCC[C@H]2C(=O)N3CCC[C@H]3C(=O)O	CHEMBL3322118	171	2	1	0	1	4	13	0	-2	561.68	0	910.599	559.36	254.641	96.599	0	1759.88	4.5	14	0	0.0326142	0.774154	56.852	18.159	33.893	26.845	-1.981	-2.673	-1.647	0.932	0.692	-2.654	1.029	-6.687	0	0	8	-1.435	1	0	0	68.005	213.968	13	3	2	15	0
[nH]1cncc1C[C@H](NC(=O)[C@@H](N)C(C)C)C(=O)N[C@@H](CC(C)C)C(=O)N[C@@H](C)C(=O)N2CCC[C@H]2C(=O)O	CHEMBL3322119	172	1	1	0	1	4	14	0	-2	535.642	0	905.705	547.348	272.31	86.047	0	1711.18	4.75	12.75	0	0.0306811	0.763911	54.16	17.936	32.572	26.302	-1.986	-2.552	-1.557	0.816	0.415	-2.993	0.678	-6.954	0	0	8	-1.414	1	0	0	74.845	223.002	13	3	2	10	0
CC[C@H](C)[C@H](N)C(=O)N[C@@H](C)C(=O)N[C@@H](Cc1ccc(O)cc1)C(=O)N[C@@H](CCCCN)C(=O)N2CCC[C@H]2C(=O)O	CHEMBL3322120	173	8	2	0	1	4	19	0	-2	590.718	0	954.156	555.708	294.557	103.89	0	1840.37	6.75	13	0	0.0353978	0.76117	56.29	19.849	36.033	27.061	-2.315	-1.736	-1.341	-0.039	0.097	-3.174	0.099	-8.883	0	0	11	-1.484	1	0	0	51.825	239.965	13	3	2	11	0
CC(C)C[C@H](N)C(=O)N[C@@H](C)C(=O)N[C@@H](CC(C)C)C(=O)N1CCC[C@H]1C(=O)N2CCC[C@H]2C(=O)O	CHEMBL3322121	174	0	1	0	1	4	12	0	-2	509.645	0	887.145	684.143	203.002	0	0	1677.16	3.5	12.5	0	0.0263602	0.769519	53.261	16.198	29.612	21.994	-1.524	-3.43	-0.973	1.318	2.783	-2.047	3.482	-6.171	0	0	7	-1.318	1	0.064	0	53.612	186.062	11	2	2	10	0
CC(C)[C@H](N)C(=O)N[C@@H](CC(C)C)C(=O)N1CCC[C@H]1C(=O)N[C@@H](Cc2ccc(O)cc2)C(=O)N3CCC[C@H]3C(=O)O	CHEMBL3322106	175	3	1	0	1	4	14	0	-2	587.715	0	893.841	559.211	246.899	87.731	0	1787.58	4.5	13.25	0	0.0314457	0.796922	57.234	18.073	33.97	26.069	-1.444	-2.318	-2.484	1.343	0.754	-2.474	1.236	-6.479	0	0	9	-1.247	1	0	0	72.556	203.017	12	3	2	16	0
O=C(O)[C@@H]1CCCN1C(=O)[C@H](Cc2ccc(O)cc2)NC(=O)[C@H]([C@@H](C)CC)NC(=O)[C@H](CCC(=O)N)NC(=O)[C@@H](N)Cc3cnc[nH]3	CHEMBL3322107	176	10	1	0	1	5	19	0	-2	656.737	0	974.569	409.305	373.546	191.718	0	1930.98	7.75	16	0	0.0457044	0.769491	60.755	21.938	41.918	34.764	-3.57	-1.461	-2.113	1.777	0.041	-4.389	0.062	-7.967	0	0	12	-2.083	1	0	0	80.202	289.901	16	3	2	16	0
CC(C)[C@H](N)C(=O)N[C@@H](CC(C)C)C(=O)N[C@@H]([C@@H](C)CC)C(=O)N[C@@H](C(C)C)C(=O)N1CCC[C@H]1C(=O)O	CHEMBL3322108	177	0	1	0	1	4	15	0	-2	539.714	0	922.873	741.628	181.245	0	0	1790.86	3.75	11.25	0	0.0236062	0.772795	55.885	17.075	30.01	19.886	-0.22	-4.129	-1.963	1.371	5.089	-1.965	5.819	-5.482	0	0	7	-0.946	1	0	0	46.606	185.525	11	3	2	5	0
[nH]1cncc1C[C@H](N)C(=O)N[C@@H](CC(C)C)C(=O)N2CCC[C@H]2C(=O)N[C@@H](CC(C)C)C(=O)N3CCC[C@H]3C(=O)O	CHEMBL3322122	178	2	1	0	1	4	14	0	-2	575.707	0	923.426	581.091	241.088	101.247	0	1803.25	4.5	14	0	0.0321612	0.77589	57.989	18.457	34.148	26.449	-1.619	-2.774	-1.913	0.938	0.965	-2.552	1.417	-6.325	0	0	8	-1.371	1	0	0	66.027	212.918	13	3	2	15	0
O=C(O)[C@@H]1CCCN1C(=O)[C@H](C)NC(=O)[C@H](C(C)C)NC(=O)[C@H](Cc2ccccc2)NC(=O)[C@@H](N)Cc3ccccc3	CHEMBL3322123	179	2	1	0	1	4	14	0	-2	579.695	0	915.639	414.57	195.783	305.285	0	1789.06	3.75	11.25	0	0.0237927	0.778378	59.37	19.258	32.076	23.07	0.034	-3.814	-3.463	0.005	3.036	-2.036	4.129	-4.771	0	0	9	-0.901	1	0	0	57.477	190.603	11	3	2	17	0
C[C@H](N)C(=O)N[C@@H](C(C)C)C(=O)N1CCC[C@H]1C(=O)N[C@@H](Cc2ccc(O)cc2)C(=O)N3CCC[C@H]3C(=O)O	CHEMBL3322124	180	3	1	0	1	4	12	0	-2	545.634	0	824.131	466.713	260.795	96.623	0	1633.86	4.5	13.25	0	0.0341056	0.814038	52.45	16.807	32.592	26.816	-2.415	-1.446	-1.681	1.577	0.515	-2.385	0.89	-6.896	0	0	9	-1.493	1	0	0	76.857	201.823	12	3	2	16	0
CC(C)[C@H](N)C(=O)N[C@@H](CC(C)C)C(=O)N1CCC[C@H]1C(=O)N[C@@H]([C@@H](C)CC)C(=O)N2CCC[C@H]2C(=O)O	CHEMBL3322125	181	0	1	0	1	4	13	0	-2	537.698	0	922.76	738.329	184.431	0	0	1763.59	3.5	12.5	0	0.0253428	0.765022	56.077	16.882	30.328	21.529	-0.876	-3.931	-1.51	1.245	4.391	-1.922	5.397	-5.733	0	0	7	-1.153	1	7.397	0	50.866	180.515	11	2	2	10	0
O=C(O)[C@@H]1CCCN1C(=O)[C@H](Cc2cnc[nH]2)NC(=O)[C@H]([C@@H](C)CC)NC(=O)[C@H](CCCCN)NC(=O)[C@@H](N)CC(=O)O	CHEMBL3322126	182	10	2	0	2	4	20	0	-2	608.693	0	925.391	512.696	347.289	65.406	0	1823.8	6.75	14.75	0	0.0414113	0.780113	54.617	19.599	37.355	29.49	-2.903	-0.311	-0.993	2.258	0.006	-3.649	0.008	-9.895	0	0	11	-1.943	1	0	0	63.966	290.006	16	3	2	10	0
O=C(O)[C@@H]1CCCN1C(=O)[C@H](Cc2ccc(O)cc2)NC(=O)[C@H](CC(C)C)NC(=O)CNC(=O)[C@@H](NC(=O)[C@@H](N)CC(=O)O)Cc3ccc(O)cc3	CHEMBL3322127	183	11	1	0	2	5	21	0	-2	726.782	0	1033.48	400.814	391.139	241.525	0	2081.86	6	15.5	0	0.0367372	0.762953	65.984	23.381	41.985	30.629	-1.763	-2.874	-3.871	3.241	0.01	-4.783	0.012	-7.924	0	0	13	-1.822	1	0	0	63.461	315.95	17	3	2	17	0
[H]/N=C(N)\NCCC[C@H](NC(=O)[C@@H](N)C(C)C)C(=O)NCC(=O)N1CCC[C@H]1C(=O)N[C@@H](Cc2ccccc2)C(=O)N3CCC[C@H]3C(=O)O	CHEMBL3322128	184	10	1	1	1	5	18	0	-2	671.795	0	988.676	488.343	351.988	148.346	0	1989.48	7.75	16.25	0	0.0457562	0.773756	63.324	21.924	42.795	33.87	-3.209	-2.192	-2.046	2.053	0.084	-4.042	0.103	-9.881	0	0	10	-1.935	1	0	0	67.322	286.702	16	3	2	16	0
CC(C)[C@H](N)C(=O)N[C@@H]([C@@H](C)CC)C(=O)N[C@@H](CCC(=O)O)C(=O)N[C@@H](CCCCN)C(=O)N[C@@H](Cc1ccc(O)cc1)C(=O)N2CCC[C@H]2C(=O)O	CHEMBL3322129	185	13	2	0	2	5	25	0	-2	747.887	0	1115.58	659.344	342.155	114.084	0	2245.17	8	16.75	0	0.0424676	0.743298	68.735	24.282	44.523	33.758	-1.989	-1.293	-2.192	2.805	0.006	-4.275	0.009	-9.148	0	0	13	-1.974	1	0	0	75.001	312.374	17	3	2	11	0
NCCCC[C@H](N)C(=O)N[C@@H](C(C)C)C(=O)N[C@@H](CC(C)C)C(=O)N1CCC[C@H]1C(=O)N[C@@H](C(C)C)C(=O)N2CCC[C@H]2C(=O)O	CHEMBL3322130	186	10	2	0	1	5	19	0	-2	651.845	0	1042.73	787.091	255.644	0	0	2078.2	5.75	15.25	0	0.0350695	0.755294	64.816	20.747	38.538	28.702	-2.052	-1.869	-0.815	1.736	0.151	-2.772	0.248	-8.532	0	0	10	-1.546	1	0	0	74.091	239.683	14	3	2	10	0
N1CCC[C@H]1C(=O)N[C@@H](C(C)C)C(=O)N[C@@H](C(C)C)C(=O)N[C@@H](C(C)C)C(=O)N2CCC[C@H]2C(=O)N3CCC[C@H]3C(=O)O	CHEMBL3322131	187	3	1	0	1	5	12	0	-2	606.761	0	990.88	800.038	190.841	0	0	1941.86	2.75	14.75	0	0.0246852	0.759666	63.854	18.379	33.675	24.865	-1.283	-3.642	-1.409	2.532	2.45	-1.966	4.64	-5.947	0	0	6	-1.407	1	0.481	0	75.05	201.27	13	2	1	15	0
O=C(O)[C@@H]1CCCN1C(=O)[C@@H]2CCCN2C(=O)[C@H]([C@@H](C)CC)NC(=O)[C@H](CCC(=O)N)NC(=O)[C@@H]3CCCN3C(=O)[C@@H](N)CCCN/C(=N/[H])N	CHEMBL3322132	188	13	1	1	1	6	19	0	-2	706.841	0	1093.44	667.081	426.363	0	0	2127.62	9.5	20	0	0.0563762	0.731641	66.793	23.616	48.047	42.784	-5.502	-1.01	-0.218	3.453	0.008	-5.493	0.018	-11.678	0	0	11	-2.764	1	0	0	109.601	328.184	18	3	2	15	0
NC(=O)C[C@H](N)C(=O)N[C@@H]([C@@H](C)CC)C(=O)N[C@@H](Cc1ccccc1)C(=O)N[C@@H](Cc2ccc(O)cc2)C(=O)N[C@@H](CS)C(=O)N3CCC[C@H]3C(=O)O	CHEMBL3322133	189	11	1	0	1	6	22	1	-2	755.885	0	1049.99	414.669	346.809	239.641	48.874	2165.68	6	14.75	0	0.0344097	0.770976	68.679	23.98	42.42	33.024	-1.604	-1.782	-4.087	2.947	0.041	-4.134	0.217	-7.017	0	0	14	-1.682	1	0	0	112.276	296.191	16	3	2	17	0
CC(C)C[C@H](N)C(=O)N[C@@H](Cc1cnc[nH]1)C(=O)N[C@@H](CC(C)C)C(=O)N2CCC[C@H]2C(=O)N[C@@H](CC(C)C)C(=O)N3CCC[C@H]3C(=O)O	CHEMBL3322134	190	11	1	0	1	5	18	0	-2	688.866	0	1150.91	796.506	268.604	85.797	0	2221.2	4.75	15.75	0	0.0298254	0.715345	72	23.162	39.884	28.909	-0.757	-4.904	-2.769	1.406	0.453	-3.622	0.74	-6.502	0	0	9	-1.265	1	0	0	74.456	247.577	15	3	2	15	0
CC(C)C[C@H](N)C(=O)N[C@@H](Cc1cnc[nH]1)C(=O)N[C@@H](CC(C)C)C(=O)N2CCC[C@H]2C(=O)N[C@@H](C)C(=O)N3CCC[C@H]3C(=O)O	CHEMBL3322135	191	9	1	0	1	5	16	0	-2	646.785	0	1019.66	643.829	286.727	89.105	0	1996.41	4.75	15.75	0	0.0336645	0.751987	64.32	20.715	38.007	30.848	-2.175	-2.381	-1.955	1.983	0.202	-3.383	0.483	-7.016	0	0	9	-1.666	1	0	0	96.988	248.149	15	3	2	15	0
CC(C)C[C@H](N)C(=O)N[C@@H](Cc1cnc[nH]1)C(=O)N[C@@H](CC(C)C)C(=O)N2CCC[C@H]2C(=O)N[C@@H](Cc3ccc(O)cc3)C(=O)N4CCC[C@H]4C(=O)O	CHEMBL3322136	192	10	1	0	1	5	19	0	-2	738.882	0	1047.33	586.155	277.783	183.389	0	2174.95	5.75	16.5	0	0.0377777	0.775143	70.439	22.711	42.395	30.085	-1.321	-3.354	-3.728	1.908	0.51	-3.265	0.596	-6.231	0	0	11	-1.482	1	0	0	57.098	256.811	16	3	2	21	0
CC(C)C[C@H](N)C(=O)N[C@@H](Cc1cnc[nH]1)C(=O)N[C@@H](CC(C)C)C(=O)N2CCC[C@H]2C(=O)NCC(=O)N3CCC[C@H]3C(=O)O	CHEMBL3322137	193	7	1	0	1	5	16	0	-2	632.759	0	945.542	682.467	201.261	61.813	0	1903.97	4.75	15.75	0	0.0363033	0.785703	60.36	18.714	35.681	26.839	-2.102	-2.61	-1.686	2.659	2.788	-2.176	3.628	-5.537	0	0	9	-1.82	1	0	0	55.595	243.947	15	3	2	15	0
CC(C)C[C@H](N)C(=O)N[C@@H](Cc1cnc[nH]1)C(=O)N[C@@H](CC(C)C)C(=O)N[C@@H](Cc2ccc(O)cc2)C(=O)N[C@@H](CC(C)C)C(=O)N3CCC[C@H]3C(=O)O	CHEMBL3322138	194	10	1	0	1	5	22	0	-2	754.925	0	1109.96	609.563	312.584	187.811	0	2284.53	6	15.25	0	0.0336542	0.755769	72.94	24.247	43.208	30.057	-0.491	-3.71	-4.457	1.574	0.183	-4.012	0.262	-6.569	0	0	11	-1.182	1	0	0	71.715	274.697	16	3	2	16	0
CC(C)C[C@H](N)C(=O)N[C@@H](Cc1cnc[nH]1)C(=O)N[C@@H](CC(C)C)C(=O)N[C@@H](Cc2c[nH]c(c23)cccc3)C(=O)N[C@@H](CC(C)C)C(=O)N4CCC[C@H]4C(=O)O	CHEMBL3322139	195	11	1	0	1	5	21	0	-2	777.962	0	1155.68	623.477	277.972	254.234	0	2355.9	6	14.5	0	0.030733	0.740908	77.073	25.334	43.698	30.764	0.528	-4.438	-5.38	1.017	0.311	-3.68	0.593	-5.793	0	0	10	-0.859	1	0	0	83.866	267.993	16	3	2	19	0
CC(C)C[C@H](N)C(=O)N[C@@H](C)C(=O)N[C@@H](Cc1ccc(O)cc1)C(=O)N[C@@H](Cc2ccccc2)C(=O)N[C@@H](Cc3ccc(O)cc3)C(=O)N4CCC[C@H]4C(=O)O	CHEMBL3321761	196	11	1	0	1	5	21	0	-2	772.897	0	1164.75	510.739	309.406	344.602	0	2365.45	6	14.5	0	0.0304938	0.737128	78.318	26.347	44.706	30.362	0.468	-5.146	-5.519	0.524	0.214	-4.1	0.283	-6.054	0	0	13	-0.841	1	0	0	66.939	269.128	15	3	2	23	0
c1ccccc1C[C@H](N)C(=O)N[C@@H](C)C(=O)N2CCC[C@H]2C(=O)O	CHEMBL28361	241	0	1	0	1	2	7	0	-1	333.386	0	555.675	248.675	168.369	138.631	0	1041.19	3.25	7.75	0	0.0251433	0.894052	32.343	10.954	20.189	15.719	-1.685	-1.432	-0.987	-0.077	10.334	-0.864	7.885	-5.525	0	0	6	-1.044	2	35.231	0	23.303	130.194	7	0	1	11	0
O=C1CC[C@H](N1)C(=O)N[C@@H](CCCCN)C(=O)N[C@@H](Cc2ccccc2)C(=O)N[C@@H](C)C(=O)N3CCC[C@H]3C(=O)O	CHEMBL2370850	258	7	1	0	1	5	15	0	-2	572.66	0	945.622	493.731	306.187	145.703	0	1773.1	4	13	0	0.0274951	0.749208	56.565	19.144	33.093	29.382	-2.41	-1.468	-1.748	1.668	0.085	-3.579	0.305	-7.272	0	0	9	-1.665	1	0	0	121.068	240.075	13	3	2	16	0
CC(C)C[C@H](N)C(=O)N[C@@H](C)C(=O)N1CCC[C@@H]1C(=O)O	CHEMBL340119	641	1	1	0	1	2	7	0	-1	299.369	0	526.763	378.67	148.093	0	0	980.99	3.25	7.75	0	0.0265233	0.906413	28.611	9.347	18.353	14.971	-2.039	-0.842	-0.022	0.784	14.561	-0.662	12.725	-5.639	0	0	5	-1.159	2	35.827	0	28.748	129.003	7	0	1	5	0
Cc1ccc(cc1)S(=O)(=O)N[C@@H](Cc2ccccc2)C(=O)NCC(=O)N3CCC[C@H]3C(=O)O	CHEMBL29031	643	0	0	0	1	2	9	0	-2	473.543	0	747.939	281.22	214.053	252.666	0	1400.9	1.5	10.5	0	0.0171937	0.809539	46.544	14.87	24.905	17.154	1.713	-3.691	-4.095	-1.263	14.607	-2.156	10.878	-3.71	0	0	5	-0.842	2	57.818	0	25.763	157.473	9	0	1	17	0
NC(N)=NCCC[C@H](N)C(=O)N[C@@H](C)C(=O)N1CCC[C@@H]1C(=O)O	CHEMBL129432	651	3	1	1	1	2	10	0	-2	342.397	0	584.568	331.262	253.307	0	0	1066.76	7.25	9.75	0	0.0449095	0.863722	30.117	11.609	25.631	23.215	-3.565	-0.533	0.08	0.093	1.385	-1.904	1.062	-9.353	0	0	7	-1.514	1	0	0	31.756	198.529	10	1	2	5	0
c1ccccc1C[C@H](N)C(=O)NCC(=O)N2CCC[C@H]2C(=O)O	CHEMBL27560	655	0	1	0	1	2	7	0	-2	319.36	0	619.697	220.801	205.63	193.267	0	1061.16	3.25	7.75	0	0.0225457	0.811907	33.665	11.579	20.45	18.523	-1.864	-1.48	-0.735	-1.667	2.774	-1.54	3.273	-6.019	0	0	6	-1.099	1	23.961	0	50.667	136.653	7	0	1	11	0
c1ccccc1C[C@H](N)C(=O)N2CCC[C@H]2C(=O)N3CCC[C@@H]3C(=O)O	CHEMBL338446	656	0	1	0	1	2	6	0	-1	359.424	0	639.809	288.45	164.953	186.406	0	1159.95	3	9	0	0.0243643	0.834465	38.195	12.151	22.151	17.875	-1.399	-2.304	-1.088	-1.269	9.677	-0.979	8.547	-5.389	0	0	6	-0.979	2	36.396	0	30.954	122.436	7	0	1	16	0
c1ccccc1C[C@H](N)C(=O)N[C@@H](C)C(=O)N2CCC[C@@H]2C(=O)O	CHEMBL128399	657	0	1	0	1	2	7	0	-2	333.386	0	635.467	264.55	181.777	189.139	0	1111.97	3.25	7.75	0	0.0219862	0.816835	35.659	11.881	20.888	17.377	-1.397	-2.167	-0.987	-1.568	5.972	-1.276	5.746	-5.594	0	0	6	-0.976	2	32.656	0	37.245	131.516	7	0	1	11	0
c1ccccc1C[C@H](N)C(=O)N[C@@H](C)C(=O)N2CCC[C@H]2C(=O)O	CHEMBL28361	668	0	1	0	1	2	7	0	-1	333.386	0	555.675	248.675	168.369	138.631	0	1041.19	3.25	7.75	0	0.0251433	0.894052	32.343	10.954	20.189	15.719	-1.685	-1.432	-0.987	-0.077	10.334	-0.864	7.885	-5.525	0	0	6	-1.044	2	35.231	0	23.303	130.194	7	0	1	11	0
CCCC[C@H](N)C(=O)N[C@@H](C)C(=O)N1CCC[C@@H]1C(=O)O	CHEMBL340152	672	0	1	0	1	2	8	0	-2	299.369	0	609.104	429.11	179.995	0	0	1051.29	3.25	7.75	0	0.0229378	0.820897	30.782	9.947	18.779	16.004	-1.96	-1.506	-0.022	-0.6	5.894	-1.301	5.993	-6.131	0	0	5	-1.153	2	29.259	0	40.083	132.245	7	0	1	5	0
O=C1CC[C@H](N1)C(=O)N[C@@H](CCCCN)C(=O)N[C@@H](Cc2c[nH]c(c23)cccc3)C(=O)N[C@@H](C)C(=O)N4CCC[C@H]4C(=O)O	CHEMBL264538	676	7	1	0	1	5	15	0	-2	611.697	0	946	487.622	317.154	141.225	0	1815.8	5	13	0	0.0307282	0.760884	58.231	19.661	35.309	29.369	-2.369	-2.078	-2.602	1.879	0.098	-3.594	0.235	-7.49	0	0	9	-1.586	1	0	0	100.48	250.385	14	3	2	19	0
O=C(O)[C@@H]1CCCN1C(=O)[C@@H]2CCCN2C(=O)[C@H]([C@@H](C)CC)NC(=O)[C@H](CCC(=O)N)NC(=O)[C@@H]3CCCN3C(=O)[C@H](CCCN=C(N)N)NC(=O)[C@@H]4CCCN4C(=O)[C@@H](NC(=O)[C@@H](N5)CCC5=O)Cc6c[nH]c(c67)cccc7	CHEMBL408983	686	18	0	1	1	10	25	0	-2	1101.27	0	1594.39	927.751	504.305	162.334	0	3193.75	9.25	27.25	0	0.0519808	0.657816	107.158	36.497	66.535	57.286	-2.648	-3.169	-4.16	7.708	0.001	-8.713	0.012	-9.904	0	0	15	-3.294	1	0	0	193.531	446.711	26	3	2	34	0
O=C(O)CC[C@H](N)C(=O)N[C@@H](CCCCN)C(=O)N[C@@H](Cc1c[nH]c(c12)cccc2)C(=O)N[C@@H](C)C(=O)N3CCC[C@H]3C(=O)O	CHEMBL327401	700	10	2	0	2	4	19	0	-2	629.712	0	939.452	432.081	348.141	159.23	0	1855.36	7.75	14.25	0	0.0422271	0.777278	57.418	20.794	39.459	30.754	-2.613	-0.954	-1.705	1.765	0.007	-3.626	0.008	-9.676	0	0	11	-1.824	1	0	0	55.771	279.776	15	3	2	14	0
O=C(O)[C@@H]1CCCN1C(=O)[C@H](CCCN)NC(=O)[C@@H](NC)Cc2c[nH]c(c23)cccc3	CHEMBL378864	734	0	2	0	1	2	11	0	-2	429.518	0	643.957	299.495	207.83	136.631	0	1279.44	5.25	9.25	0	0.0329128	0.885092	39.291	13.735	26.419	20.251	-1.919	-0.18	-1.235	-0.939	0.952	-1.071	0.766	-7.938	0	0	7	-0.956	1	2.37	0	30.617	153.817	9	1	2	14	0
O=C(O)[C@@H]1CCCN1C(=O)[C@H](CCCN)NC(=O)[C@@H](N)Cc2c[nH]c(c23)ccc(c3)O	CHEMBL381557	735	3	2	0	1	2	12	0	-2	431.491	0	654.024	255.399	279.994	118.63	0	1263.97	7.25	9.5	0	0.039111	0.86443	37.858	14.412	29.118	23.225	-2.987	-0.06	-0.993	-1.187	0.216	-1.861	0.14	-9.235	0	0	9	-1.211	1	0	0	25.568	191.452	10	1	2	14	0
c1sccc1C[C@H](N)C(=O)N[C@@H](CCCN)C(=O)N2CCC[C@H]2C(=O)O	CHEMBL383507	736	2	2	0	1	2	11	0	-2	382.477	0	598.31	257.85	231.435	70.078	38.948	1142.69	5.25	8.75	0	0.033509	0.883468	33.183	12.515	24.215	19.845	-2.634	0.406	-0.304	-0.648	0.506	-1.184	0.717	-8.607	0	0	9	-1.194	1	0	0	37.034	154.662	8	1	2	10	0
[truncated: 6 more columns]
